# Supplementary material for: Response of Rambouillet Lambs to an Artificial Gastrointestinal Nematode Infection
Source: MDPI journal article supplement (doi:10.3390/ani12091199), 2022-05-06
Supplement: s1 [file s1]

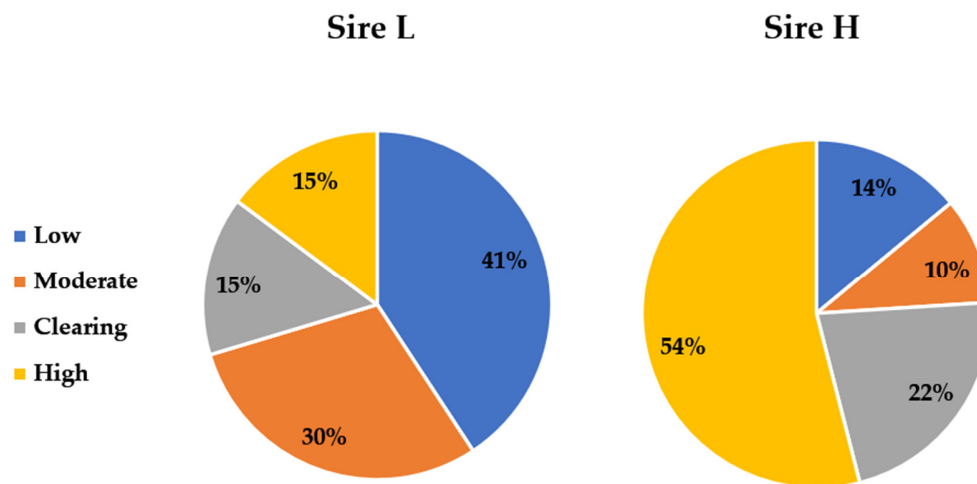

**Supplemental Figure S2.** Proportion of offspring from sires L (N = 27) and H (N = 50) that displayed either a “low”, “moderate”, “clearing”, or “high” FEC pattern. Proportion of each sire’s offspring within these classifications differed from expected values via chi-square analysis ( $p = 0.0373$ ).
