# Supplementary material for: Response of Rambouillet Lambs to an Artificial Gastrointestinal Nematode Infection
Source: MDPI journal article supplement (doi:10.3390/ani12091199), 2022-05-06
Supplement: s1 [file s1]

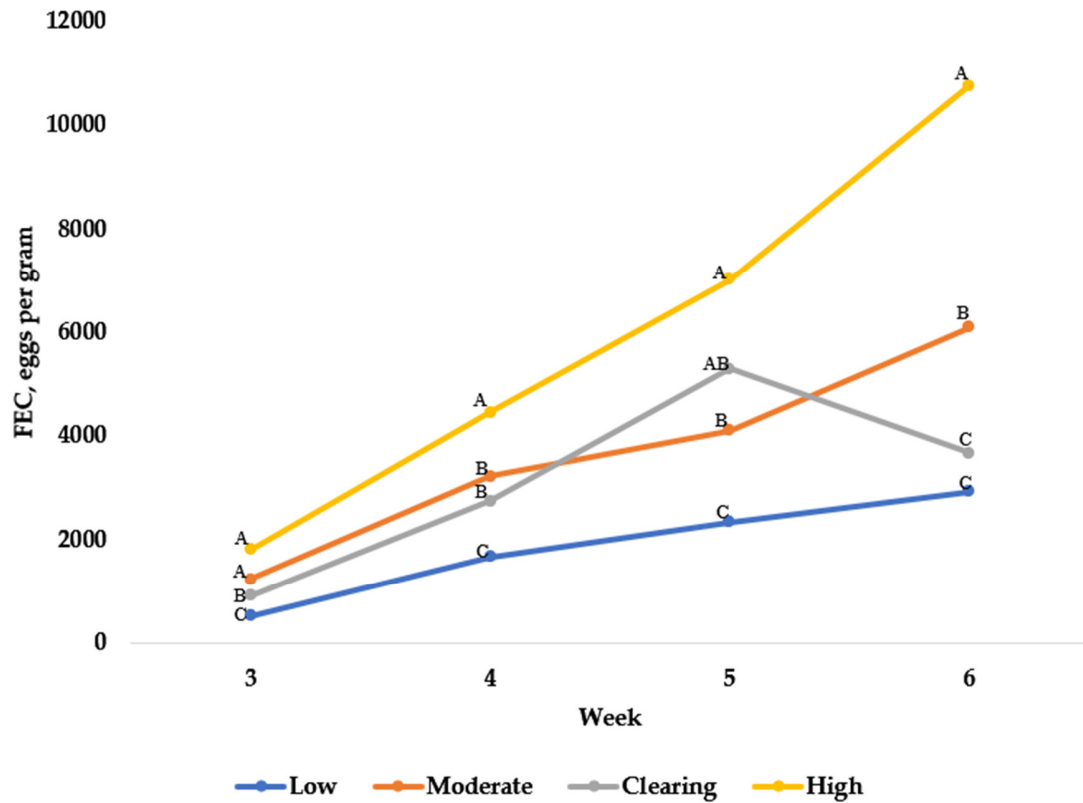

Differing letter Superscripts <sup>A,B,C</sup> denote between week differences of  $P < 0.05$

**Supplemental Figure S1.** Fecal egg counts of lambs that completed the trial ( $N = 77$ ) at weeks three, four, five, and six display an apparent differing response to a single inoculation of *Haemonchus contortus* larvae. "Low" lambs ( $N = 18$ ) displayed a weekly FEC pattern that remained below 4000 ep $g$  for the entirety of the trial. "Moderate" lambs ( $N = 36$ ) had a FEC between 4000 and 8000 ep $g$  at week six and did not display a "clearing" response. "Clearing" lambs ( $N = 12$ ) had a peak FEC at weeks four or five and then subsequently decreased. "High" lambs ( $N = 11$ ) displayed a FEC greater than 8000 ep $g$  at week 6. Mean FEC for each group is charted on the figure.
